# Supplementary material
Source: Springer Nature journal article supplement (https://www.springermedizin.de/resource/supplementary/13045_2008_15_MOESM4_ESM.pdf/9660480)

Fig. (4)

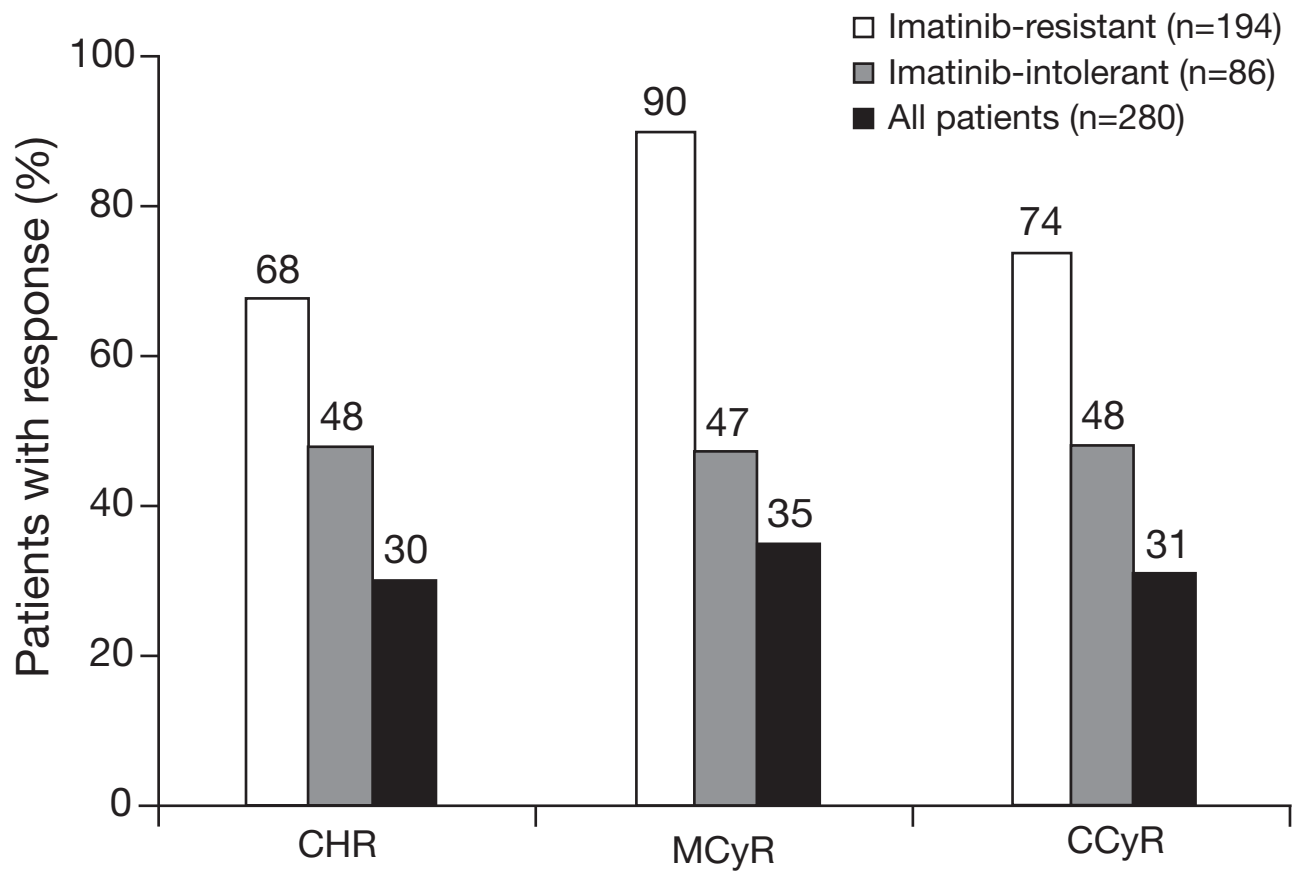

Supplement: MOESM4 [file 9660480]
